# Supplementary material for: Dopamine promotes aggression in mice via ventral tegmental area to lateral septum projections
Source: PubMed Central journal article supplement (PMC8610979; doi:10.1038/s41467-021-27092-z), 2021-11-23
Supplement: 41467_2021_27092_MOESM1_ESM.pdf [file 41467_2021_27092_MOESM1_ESM.pdf]

Supplementary Information:

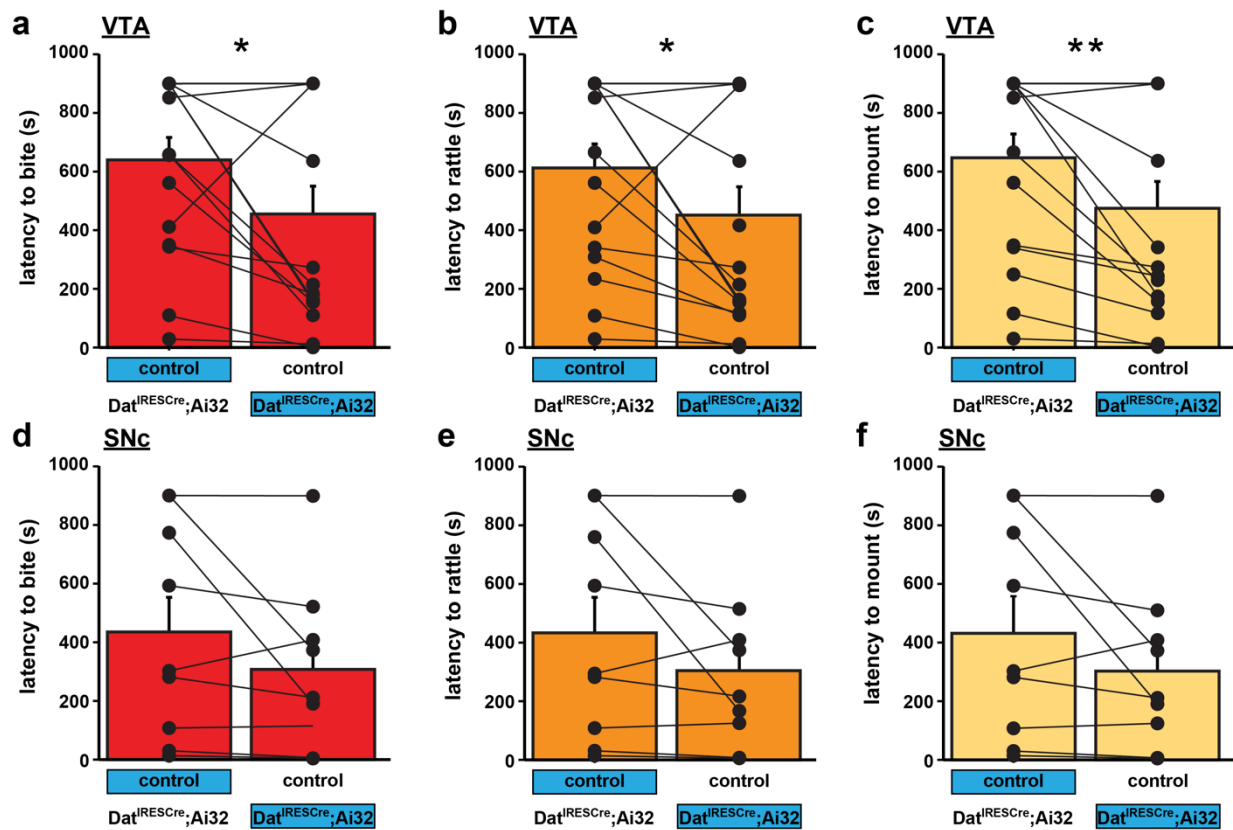

**Supplementary Figure 1. Optogenetic stimulation of DAergic VTA, not SNc, neurons decrease the latency to attack.** Heightened aggressive behavior, measured as decreased latency to bite (a), rattle (b), and mount (c) was observed in pairs when DAT<sup>RESCre, Ai32</sup> mutant mice were stimulated (blue) in the VTA. (d-f) No effect of stimulation was detected during SNc stimulation. \*,  $P < 0.05$ ; \*\*,  $P < 0.01$  compared with their respective controls; mean  $\pm$  SEM;  $n = 16$  (a-c) and 10 (d-f) pairs.

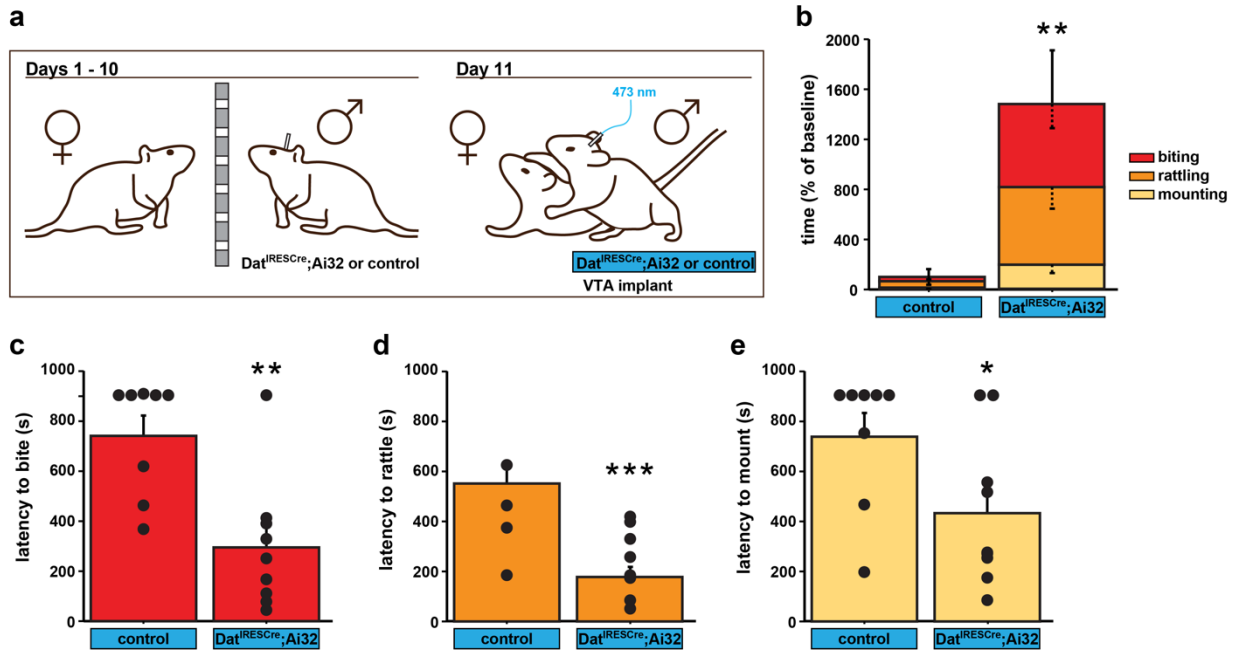

**Supplementary Figure 2. ChR2-based optogenetic stimulation of DAergic VTA neurons increases aggression against females.** (a) Schematic of the isolation-induced aggression experimental design against females. After isolation for 10 days, either DAT<sup>RESCre</sup>; Ai32 or control mice were stimulated (blue) in the VTA during an encounter with a female on Day 11. Heightened aggressive behavior including increased time spent fighting (b) and decreased latency to bite (c), rattle (d), and mount (e) was observed when DAT<sup>RESCre</sup>; Ai32 mutant mice were stimulated in the VTA in comparison to when the controls were stimulated. \*,  $P < 0.05$ ; \*\*,  $P < 0.01$ ; \*\*\*,  $P < 0.001$  compared with their respective controls; mean  $\pm$  SEM; n (control) = 8; n (DAT<sup>RESCre</sup>;Ai32) = 9

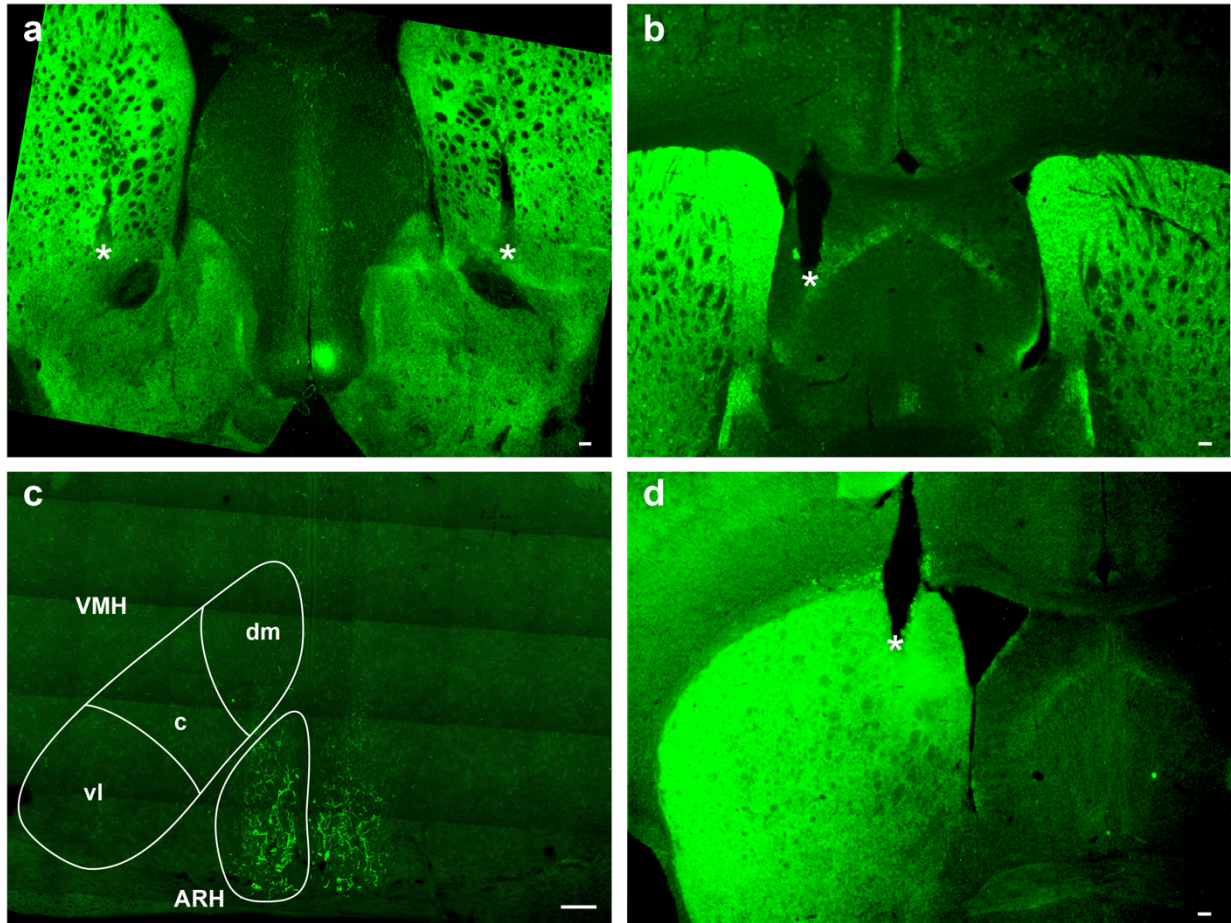

**Supplementary Figure 3. DAergic innervation assessed by EYFP distribution in  $\text{DAT}^{\text{IREScre}}$ ; Ai32 mice.** Histological confirmation of prominent DAergic input into the (a) NAc and (b) LS but not the (c) VMHvl. \*Exemplary fiberoptic placement tracks in behavioral cohorts of  $\text{DAT}^{\text{IREScre}}$ ; Ai32 mutant mice expressing ChR2-eYFP in the (a) NAc (b) LS and (d) DS. Scale bars: 100  $\mu\text{m}$ . Asterisks indicate the ventral tip of implant location.

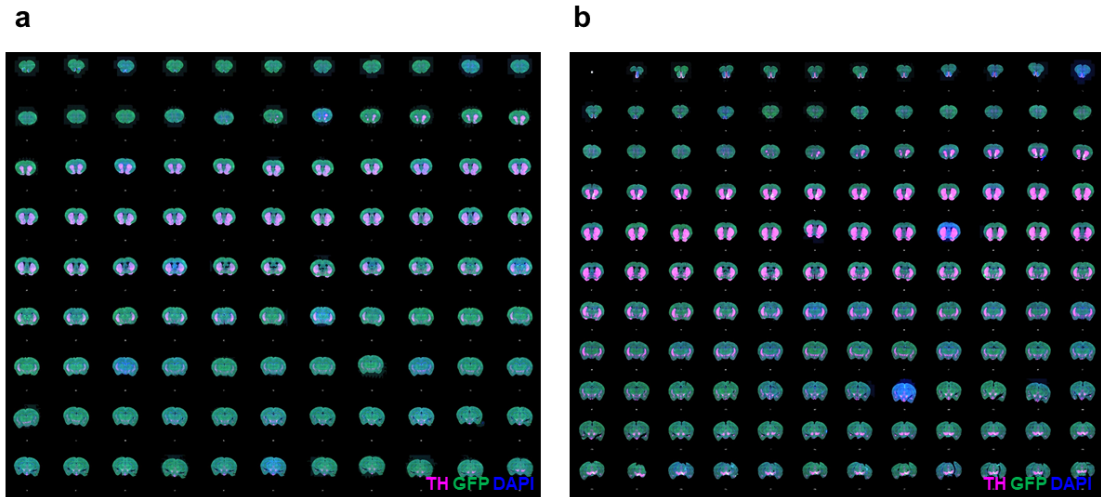

**Supplementary Figure 4. Brain-wide imaging of Retro-HSV injected brains.** (a) Brain-wide image montages created via Brain J<sup>28</sup> from the retro HSV injected into (a) LS and (b) NAc. Each section was double labeled with anti-TH (magenta), anti-GFP (green), and DAPI (blue).

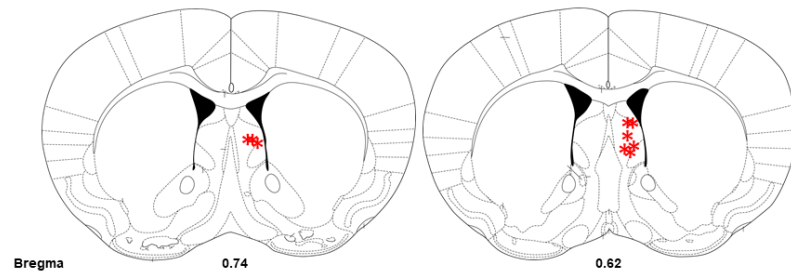

**Supplementary Figure 5. Optic Fiber placements in LS for DAT<sup>IREScree</sup>;Ai32 activation experiment.** Optic fiber location indicated by red stars from the animals used in Fig. 3a-e.

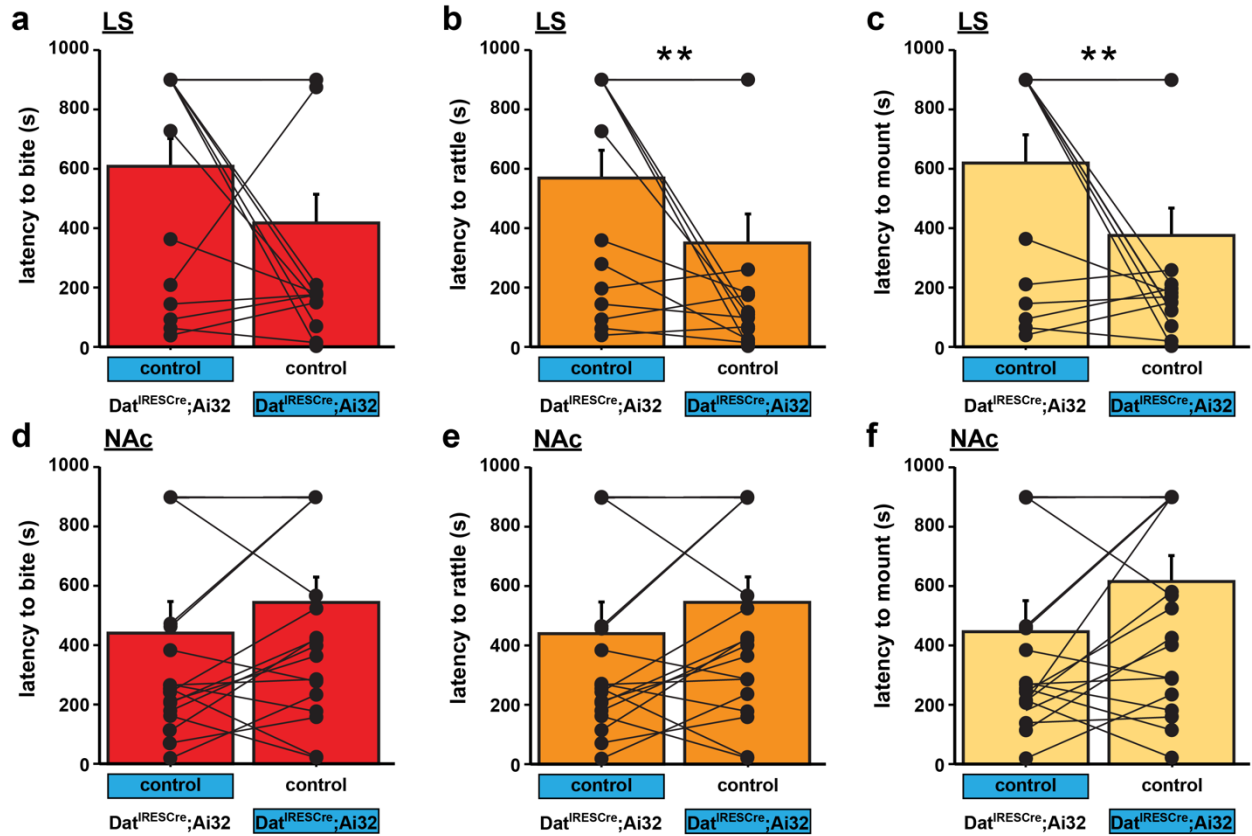

**Supplementary Figure 6. DAergic projections from the VTA to the LS, not NAc, decrease the latency to attack.** Heightened aggressive behavior, measured as decreased latency to bite (a), rattle (b), and mount (c) was observed in pairs when DAT<sup>iRESCre</sup>;Ai32 mutant mice were stimulated (blue) in the LS. (d-f) No effect of stimulation was detected during NAc stimulation. \*\*,  $P < 0.01$  compared with their respective controls; mean  $\pm$  SEM;  $n = 16$  (a-c) and 20 (d-f) pairs.

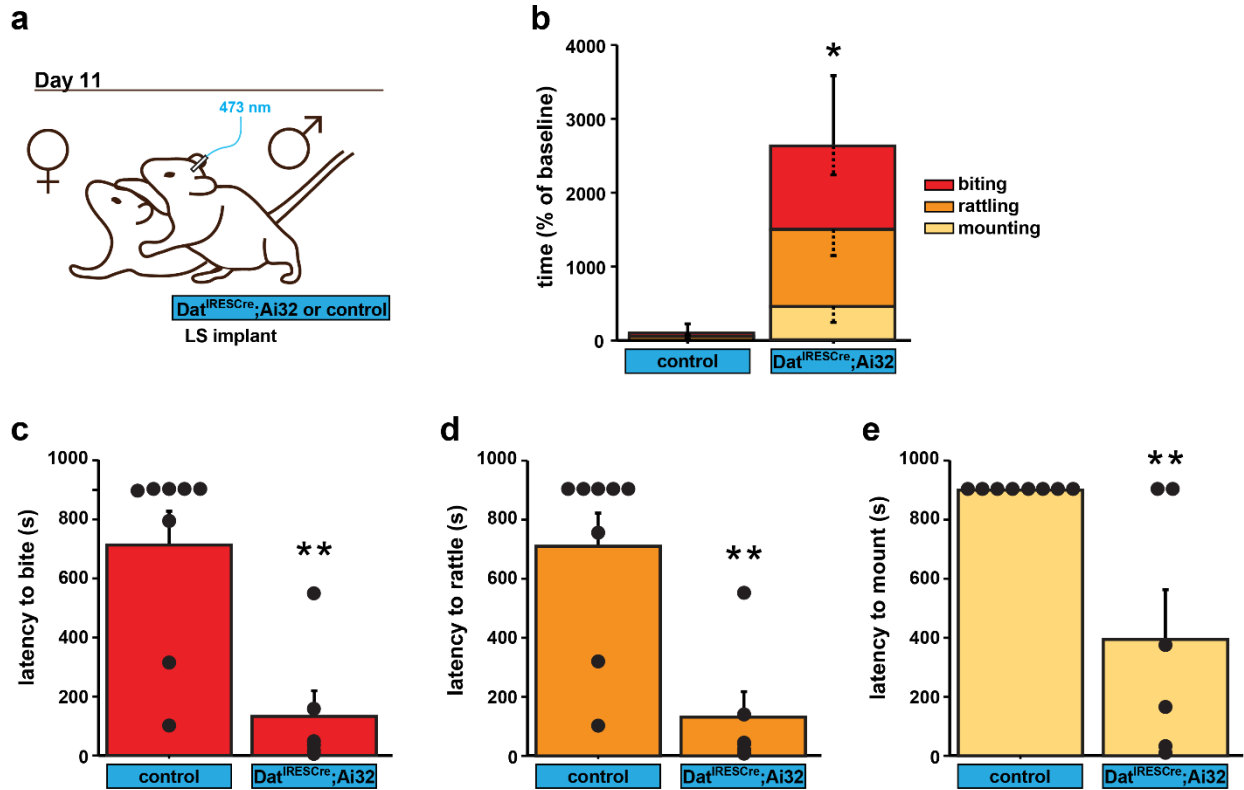

**Supplementary Figure 7. ChR2-based optogenetic stimulation of DAergic projections to the LS increases aggression against females.** (a) Schematic of  $DAT^{IRESCre}; Ai32$  mutant or control mice being stimulated in the LS during an encounter with a female on Day 11. Heightened aggressive behavior including (b) increased time spent fighting and decreased latency to bite (c), rattle (d), and mount (e) was observed when  $DAT^{IRESCre}; Ai32$  mutant mice were stimulated (blue) in the LS in comparison to when the controls were stimulated. \*,  $P < 0.05$ ; \*\*,  $P < 0.01$  compared with their respective controls; mean  $\pm$  SEM; n (control) = 8; n ( $DAT^{IRESCre};Ai32$ ) = 6.

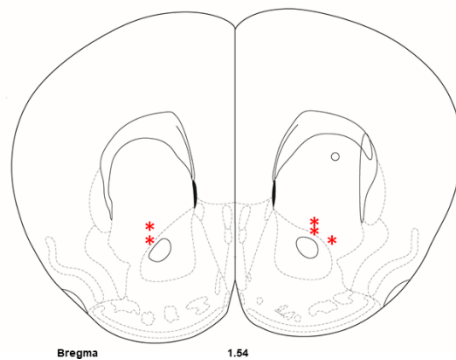

**Supplementary Figure 8. Optic Fiber placements within NAc for  $DAT^{IRESCre};Ai32$  activation experiment.** Optic fiber location indicated by red stars from the animals used in Fig. 3f-J.

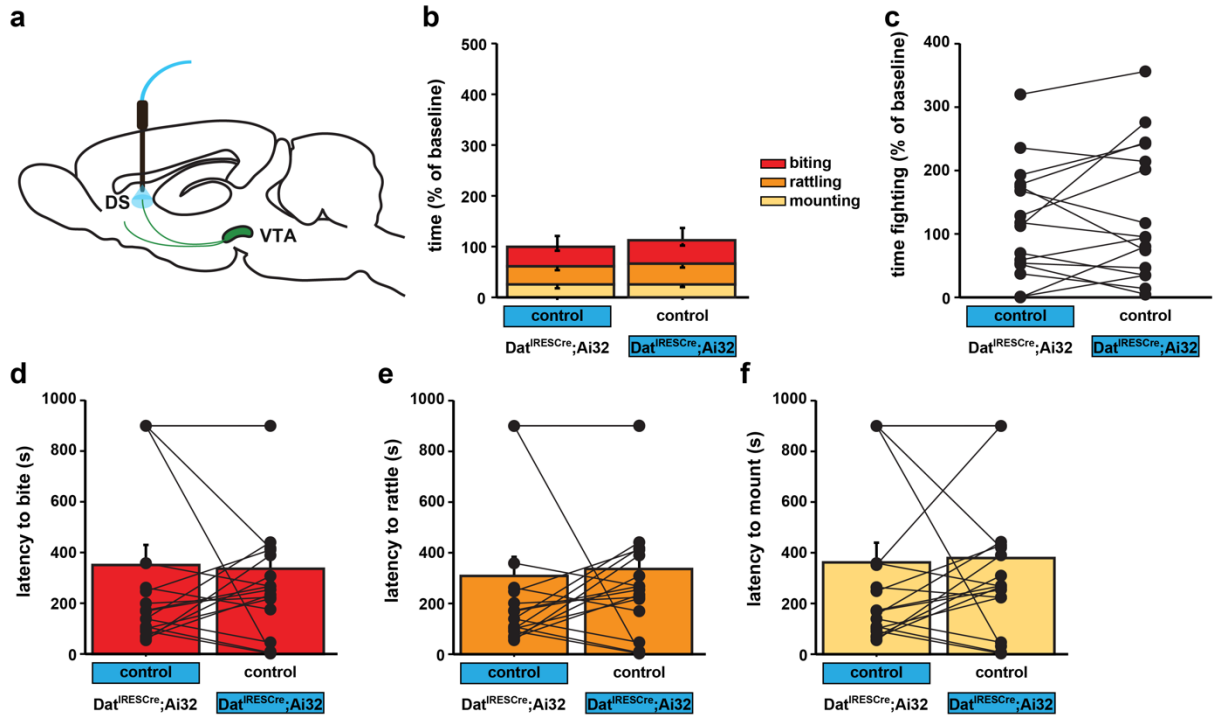

**Supplementary Figure 9. Chr2-based optogenetic stimulation of off-target DAergic fibers in the DS has no effect on aggressive behavior.** (a) The schematic diagram for stimulating DS DA release *in vivo*. No effect of stimulation (blue) was detected during DS stimulation for time spent fighting (b, c) and latency to bite (d), rattle (e), and mount (f). Mean  $\pm$  SEM;  $n = 19$  pairs.

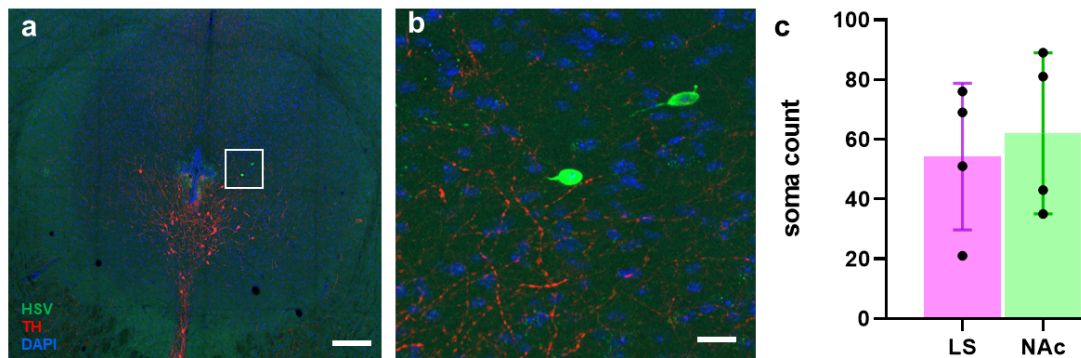

**Supplementary Figure 10. Retrograde labeling of HSV virus in PAG from the LS injected brain.** (a) HSV infected cell body in the PAG (scale bar: 200  $\mu$ m). (b) Higher magnification image of the HSV infected cells (scale bar: 20  $\mu$ m); anti-TH (Red), anti-GFP (green), and DAPI (blue). (c) Quantification of soma in PAG of LS and NAc injected brain ( $n = 4$ ), data are presented Mean  $\pm$  SEM.

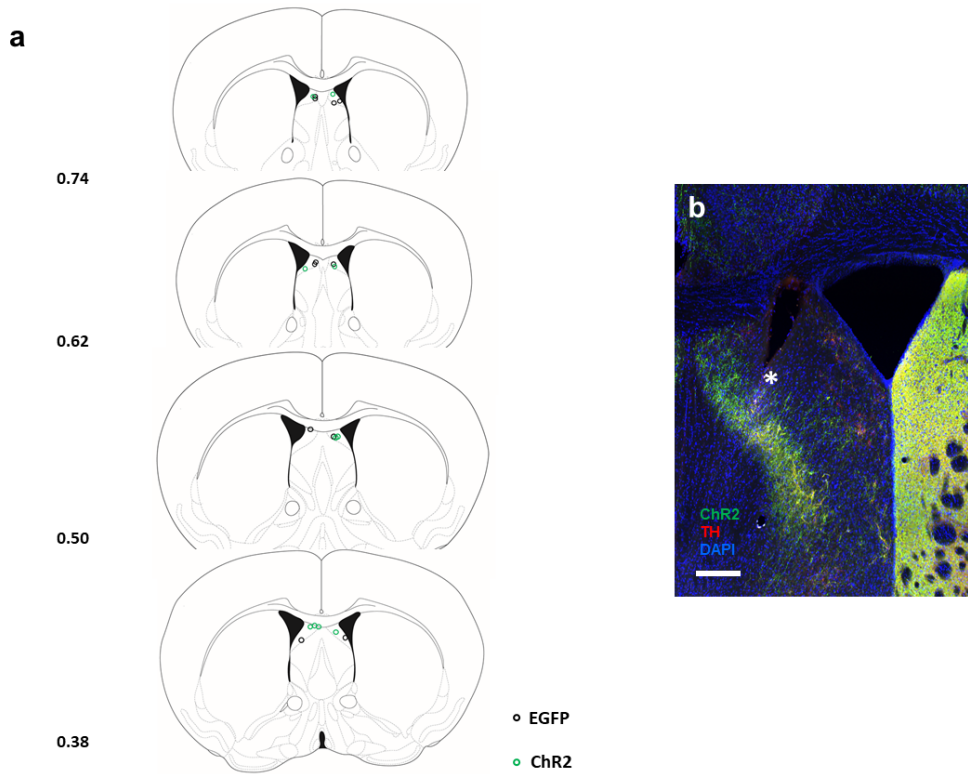

**Supplementary Figure 11. Optic Fiber placements for viral ChR2 activation experiment.** (a) Optic fiber location indicated by black (EGFP) and green (ChR2) circles from the animals used in Fig. 4. (b) Representative image of optical fiber location from the ChR2 injected animal; scale bar: 200  $\mu$ m, TH (Red), ChR2 (green) and DAPI (blue). Asterisks indicate the ventral tip of implant location.

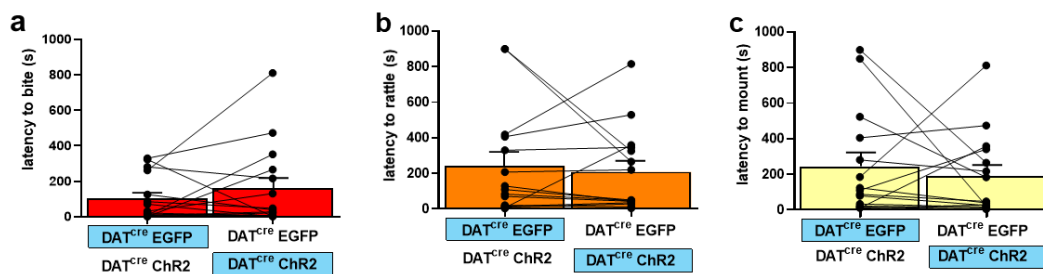

**Supplementary Figure 12. Optogenetic activation of VTA-LS DAergic fibers does not alter latency to attack.** The latency to bite (a), rattle (b), and mount (c) was not altered in pairs when DAT<sup>iresCre</sup> ChR2 injected mice were stimulated (blue) in the LS. n= 15 pairs (a), (b), and (c), data are presented Mean  $\pm$  SEM.



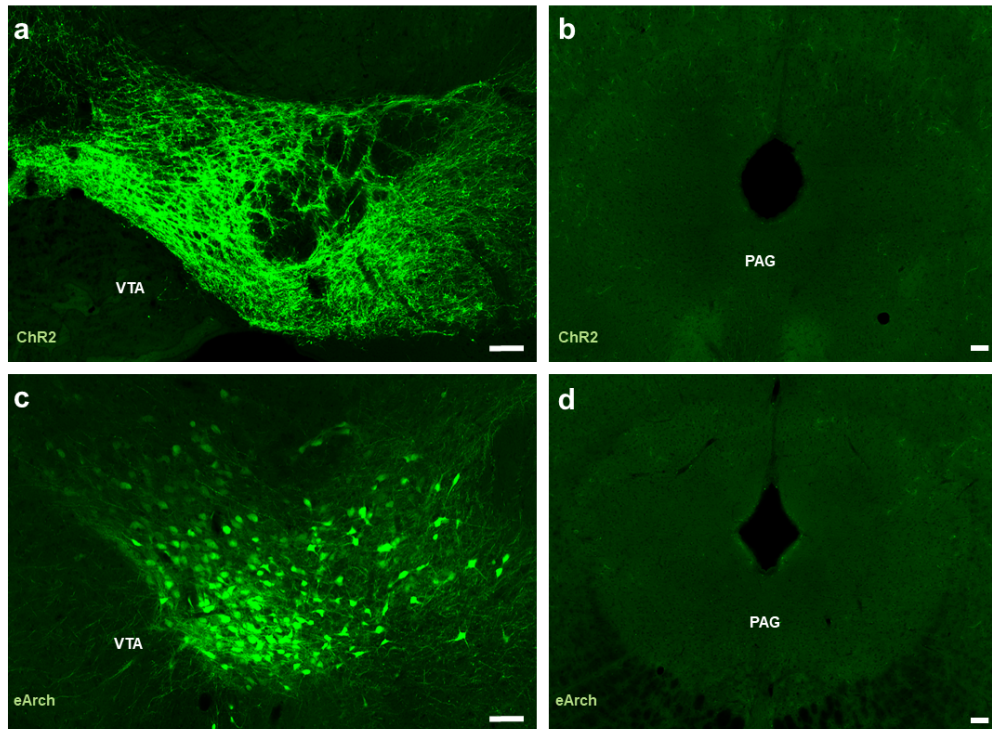

**Supplementary Figure 13. Periaqueductal gray image from ChR2 injected animal. (a)** ChR2 expression in VTA, ChR2 (green) scale bar: 100  $\mu\text{m}$  **(b)** No ChR2 infected cell body was found in PAG from the animals used in Fig. 4; ChR2 (green) scale bar: 100  $\mu\text{m}$ . **(c)** eArch expression in VTA, eArch (green) scale bar: 100  $\mu\text{m}$  **(d)** No ChR2 infected cell body was found in PAG from the animals used in Fig. 6; eArch (green), scale bar: 100  $\mu\text{m}$ .

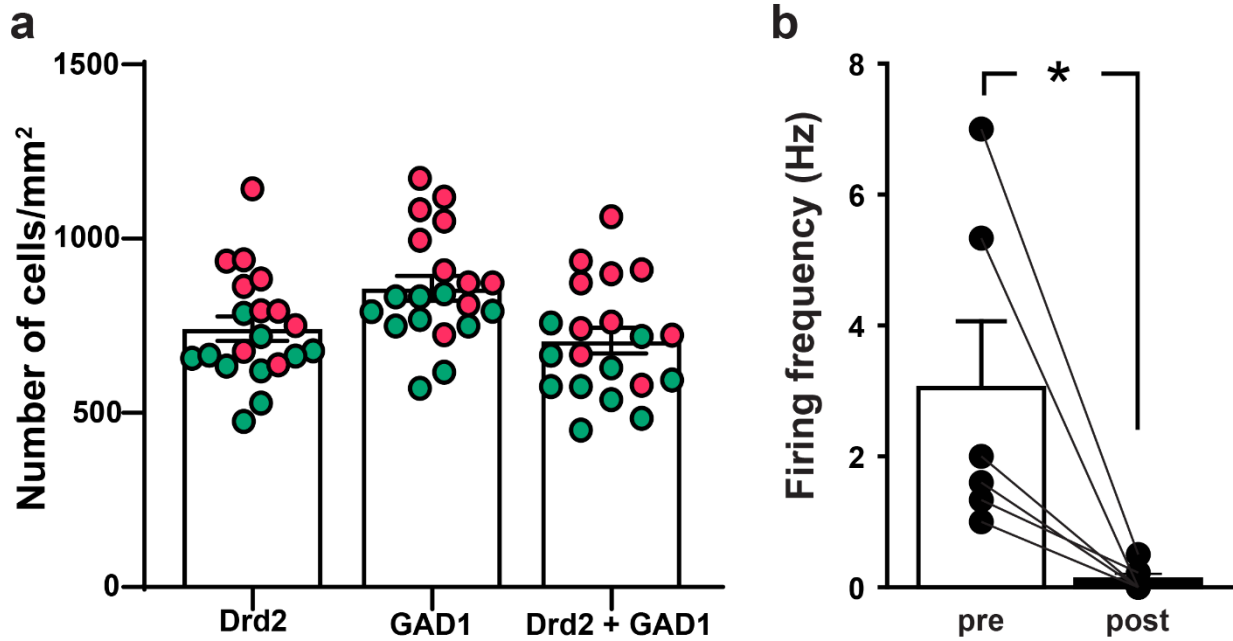

**Supplementary Figure 14. RNAscope analysis for *GAD1* and *Drd2* mRNA colocalization in the LS and firing frequency of LS neurons with IPSP responses. (a)** Brain sections containing the LS were stained for *Drd2* and *GAD1*. *Drd2*, *GAD1* and *Drd2*+*GAD1* positive cells were counted in the outlined LS. The number of cells per area was calculated and plotted. (N = 20 sections, 2 mice – color indicated), data are presented Mean ± SEM. **(b)** Average firing frequency of LS neurons that respond to blue light stimulation with an IPSP during 0.5 s window before train stimulation (pre) and during and after train stimulation (post). n of recorded cells = 6, n of recorded animals = 5,

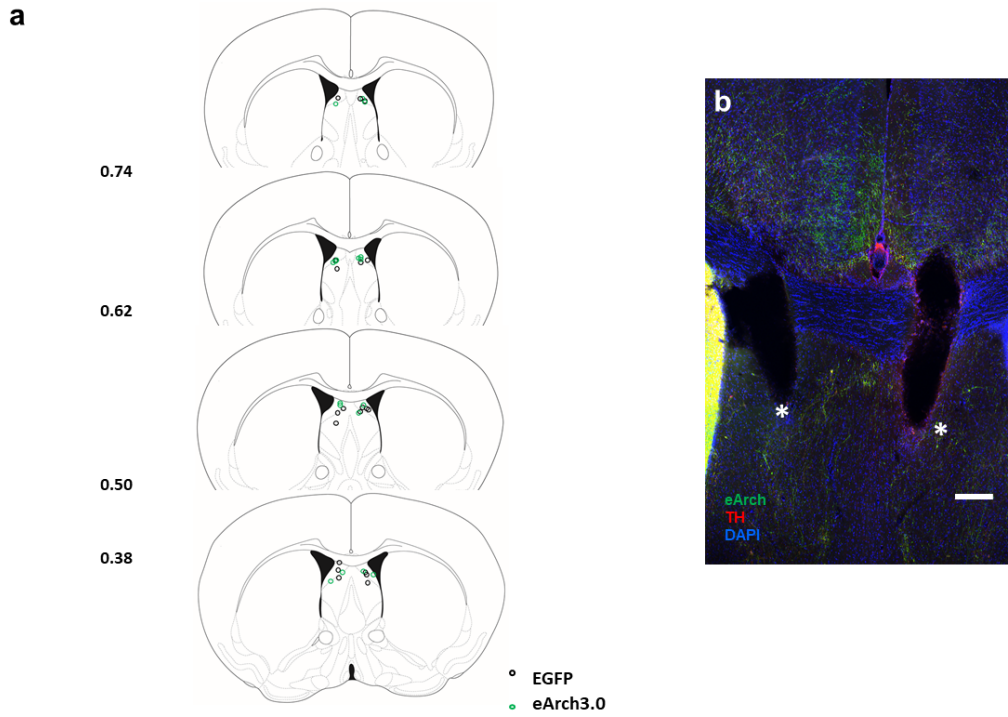

**Supplementary Figure 15. Optic Fiber placements for eArch inhibition experiment. (a)** Optic fiber location indicated by black (EGFP) and green (eArch) circles from the animals used in Fig. 6. **(b)** Representative image of optical fiber location from the eArch injected animal; scale bar: 200  $\mu$ m, TH (Red), Chr2 (green) and DAPI (blue). Asterisks indicate the ventral tip of implant location.

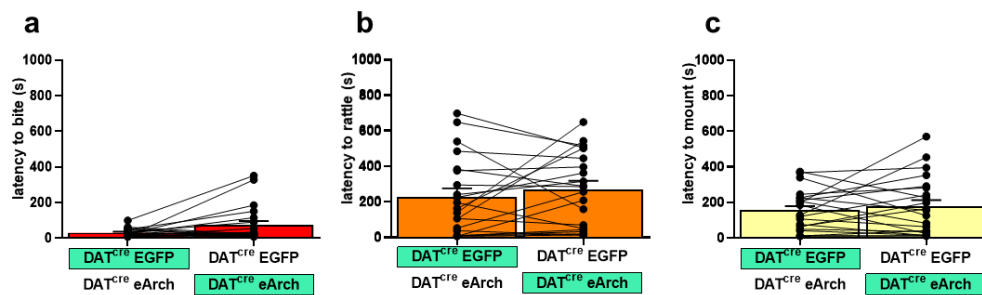

**Supplementary Figure 16. Optogenetic inhibition of VTA-LS DAergic fibers does not alter latency to attack.** The latency to bite **(a)**, rattle **(b)**, and mount **(c)** was not altered in pairs when DAT<sup>irescre</sup> eArch injected mice were stimulated (green) in the LS.  $n = 21$  pairs **(a)**, **(b)**, and **(c)**, data are presented Mean  $\pm$  SEM.

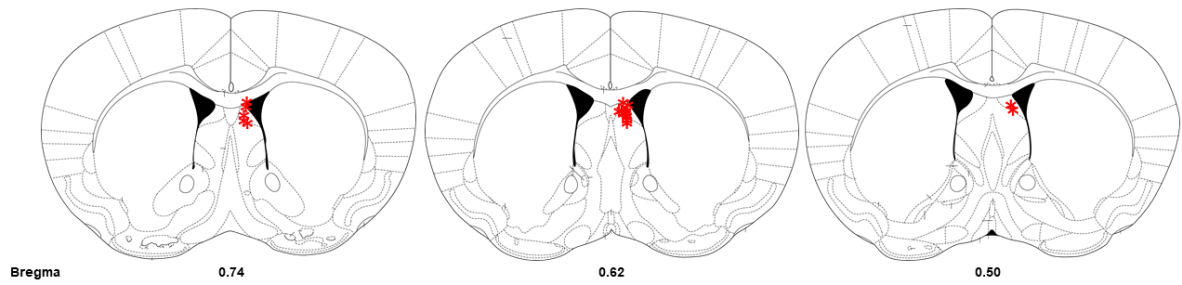

**Supplementary Figure 17. Cannula placements within LS for sulpiride infusion experiment. (a)** Cannula location indicated by red stars from the animals used in Fig. 7a-g.

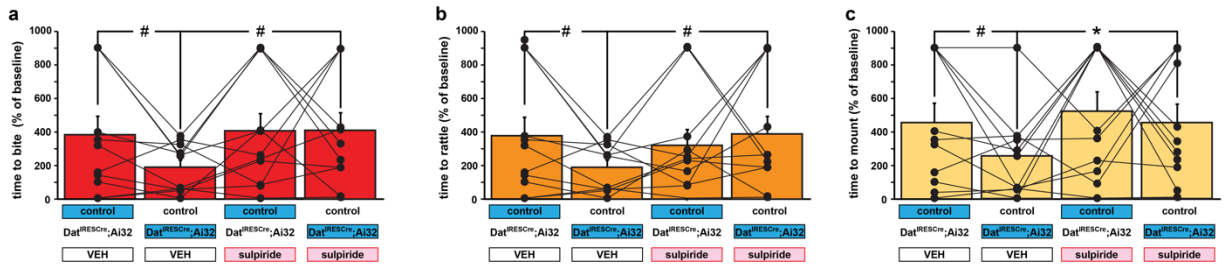

**Supplementary Figure 18. Terminal release of DA in the LS is necessary for VTA DAergic activity to decrease the latency to attack.** Pharmacological rescue of the latency to bite (a), rattle (b), and mount (c) through local D2 receptor antagonism in the LS. #,  $P < 0.1$ , \*,  $P < 0.05$  compared with their respective controls; mean  $\pm$  SEM;  $n = 11$  pairs. VEH, vehicle.
