# Supplementary material for: Dopamine promotes aggression in mice via ventral tegmental area to lateral septum projections
Source: PubMed Central journal article supplement (PMC8610979; doi:10.1038/s41467-021-27092-z), 2021-11-23
Supplement: 41467_2021_27092_MOESM3_ESM.pdf [file 41467_2021_27092_MOESM3_ESM.pdf]

## Description of Additional Supplementary Files

File Name: Supplementary Data 1

Description: Statistical analyses.

File Name: Supplementary Movie 1

Description: **3D render of retrogradely labelled neurons in VTA and PAG.** Brain-wide 3D animation of segmented VTA and PAG somas from one LS-injected mouse (magenta) and one NAc-injected mouse (green). The VTA and PAG appear in grey during the rotation.
